1 **Articles**

2

3 **Impact of the COVID-19 pandemic on infant and pediatric asthma: a**  
4 **multi-center survey using an administrative database in Japan**

5

6 Seiko Bun <sup>1,2</sup> DrPH, Kenji Kishimoto <sup>1</sup> MD, Jung-ho Shin <sup>1</sup> DDS, MPH, Daisuke

7 Takada <sup>1</sup> MD, Tetsuji Morishita <sup>1</sup> MD, PhD, Susumu Kunisawa <sup>1</sup> MD, PhD, Yuichi

8 Imanaka <sup>1</sup> MD, MPH, PhD

9

10 1 Department of Healthcare Economics and Quality Management, Graduate

11 School of Medicine, Kyoto University, Kyoto, Japan

12 2 Department of Pharmacy, National Center for Child Health and Development

13 Hospital, Tokyo, Japan

14

15 Correspondence: Yuichi Imanaka, MD, Ph.D

16 Department of Healthcare Economics and Quality Management, Graduate

17 School of Medicine, Kyoto University, Yoshida Konoe-cho, Sakyo-ku, Kyoto

18 606-8501, JAPAN

19 Tel : +81-75-753-4454 Fax : +81-75-753-4455

20 E-mail: imanaka-y@umin.net

21

22 Alternate corresponding author:

23 Seiko Bun, Department of Healthcare Economics and Quality Management,

24 Graduate School of Medicine, Kyoto University, Yoshida Konoe-cho, Kyoto

25 606-8501, Japan.

26 Tel: +81-75-753-4454, Fax: +81-75-753-4455

27 Email: bun-s@ncchd.go.jp

28

29 Words:

30 Summary: 250

31 Article: 1972words

32

33 **Key words:** Children, infant, SARS-CoV-2, COVID-19, Administrative database,

34 Asthma

35

36

37 **Abstract**

38 **Background**

39 Limited data are available on the relationship between infant and pediatric  
40 asthma and severe acute respiratory syndrome coronavirus 2 (COVID-19).  
41 Political limitations such as school closure may affect the treatment behavior of  
42 pediatric asthma. To investigate the trends of treatment behavior in the field of  
43 pediatrics during the COVID-19 pandemic.

44 **Methods**

45 This is a retrospective observational study using Diagnosis Procedure  
46 Combination (DPC) data from the Quality Indicator/Improvement Project (QIP)  
47 database. We identified children with asthma aged 15 years or younger who  
48 were patients from July 1, 2018, to June 30, 2020. The main outcome was a  
49 comparison between asthma patients' treatment behavior before the COVID-19  
50 pandemic and during the COVID-19 pandemic.  
51 We statistically tested the admission volume changes based on the discharge  
52 date after adjusting for seasonality through a Fourier term using an interrupted  
53 time-series analysis (ITS).

54 **Results**

55 We identified 10,481 inpatients cases in 67 hospitals and 258,911 out-patients  
56 cases in 180 hospitals who were diagnosed with asthma. We performed ITS  
57 analysis for inpatients. The reduction in the number of patients during this  
58 period was estimated to be 232 ( $P=0.001$ ). In addition, ITS analysis was  
59 performed for patients aged <3 years. The reduced number of patients during  
60 this period was estimated to be 155 ( $P<0.001$ ).

## 61 **Conclusions**

62 We found that the number of pediatric asthma patients dramatically decreased  
63 during the COVID-19 pandemic. We need to continue research into the trends  
64 of pediatric asthma patients after the COVID-19 pandemic in Japan.

65

66

67

68

69

70

71

72

73 **Introduction**

74 In December 2019, pneumonia caused by a novel coronavirus (SARS-CoV-2)  
75 occurred in Wuhan, China. According to the World Health Organization (WHO),  
76 217,769 deaths had been caused by coronavirus disease 2019 (COVID-19)  
77 globally by May 1, 2020<sup>1</sup>. Public health interventions, including school closure  
78 and the city lockdown, began in many countries.

79 Pediatric asthma is one of the most common diseases in infant to school-age  
80 children. Risk factors, including respiratory virus infection, air pollution, and  
81 house dust, can exacerbate pediatric asthma. Environmental triggers are  
82 particularly important. In Japan, all schools excluding nursery schools were  
83 closed nationwide on February 27, 2020<sup>2</sup>. Besides, the COVID-19 pandemic  
84 caused dramatic changes in daily practice and health care delivery systems in  
85 many countries. Some states reported hospital avoidance in pediatrics,  
86 including emergency department visits and hospital admission during the  
87 COVID-19 pandemic.

88 Unlike the lockdown policy in many countries, including the United States,  
89 China, and European countries, the Japanese lockdown did not have a legally  
90 binding force. Therefore, the lockdown in Japan was a voluntary lockdown<sup>2</sup>.

91 The 'voluntary lockdown' promoted a change of lifestyle, such as decreasing  
92 transportation and industrial activity and closure of schools, which intended to  
93 limit physical interactions among people. These political interventions may have  
94 affected the environment for children.

95 In this study, we describe the impact of the COVID-19 pandemic on pediatric  
96 asthma-related health care utilization including emergency departments and  
97 hospitalization.

98 Inhaled steroids and  $\beta_2$  agonists are a key treatment option for asthma<sup>3</sup>. The  
99 Japanese Society of Pediatric Allergy and Clinical Immunology recommends  
100 using a metered-dose inhaler rather than a nebulizer because a nebulizer can  
101 spread the aerosol on caregivers and medical staff. We also investigated the  
102 trends for the prescription of inhalers<sup>4</sup>.

103

## 104 **Methods**

### 105 **Source of data**

106 Our study was a retrospective observational study using Diagnosis Procedure  
107 Combination (DPC) data from the Quality Indicator/Improvement Project (QIP)  
108 database. The QIP database contains DPC data from acute care hospitals

109 voluntarily participating in the project. The DPC/per-diem payment system  
110 (PDPS) is a Japanese prospective payment system applied to acute care  
111 hospitals. In total, 1,730 hospitals adopted the DPC/PDPS in 2018, which  
112 accounted for 54% (482,618/891,872) of general beds of Japanese hospitals in  
113 2018<sup>5,6</sup>

114 The cumulative number of participating hospitals for the QIP was over 500,  
115 which were located all over Japan and included both public and private  
116 hospitals of various sizes. The number of general beds, which are hospital beds  
117 that are not psychiatric, infectious diseases, or tuberculosis beds according to  
118 the Japanese classification of hospital beds, ranged from 30 to 1,151 in 2016.

119 The DPC data consist of claims and discharge summaries, including  
120 International Classification of Diseases, 10<sup>th</sup> Revision (ICD-10) codes  
121 classifying the primary diagnosis, cause of admission, the most and the  
122 second-most medical-resource-intensive diagnoses, up to 10 comorbidities,  
123 and 10 complications. The DPC data also contain codes of all services and  
124 medications provided during each hospitalization as well as PDPS information.

125

126 **Study population**

127 The study was conducted after obtaining approval from the Kyoto University  
128 Hospital Ethics committee of the Kyoto University Graduate School and Faculty  
129 of Medicine, according to the guidelines on medical and epidemiological  
130 research (No. R0135). Using the DPC database, we identified inpatients with  
131 discharge dates from July 1, 2018 to June 30, 2020, and outpatients at the date  
132 of a visiting hospital within the same periods.

133 We collected data for each patient during the research period. We selected  
134 hospitals that sent DPC data for more than 9 months each year to QIP  
135 database.

136 All patients were aged  $\leq 15$  years and were diagnosed with asthma according to  
137 the ICD-10 codes (J45.x, J46).

138

### 139 **Statistical analysis**

140 An interrupted time-series analysis (ITS), including segmented regressions,  
141 was performed to evaluate the effect of the COVID-19 pandemic on  
142 population-level admissions. We statistically tested the changes in admission  
143 volume based on the discharge date after adjusting for seasonality through a  
144 Fourier term. We compared the number of admissions per month based on the



145 discharge date, not the date of admission, because the DPC data were  
146 generated after patients' discharge from hospitals. We hypothesize that  
147 COVID-19 would impact the level change of admission volume immediately  
148 after March 2020, as an implemented point. The Japanese government  
149 declared a state of emergency and requested self-quarantine, social distancing,  
150 and school closure. We classified the patients into three age groups: 0–2, 3–5,  
151 and 6–15 years. These groups corresponded to nursery school for ages 0–2,  
152 kindergarten for ages 3–5 years, elementary school for ages 6–12 years, and  
153 junior high school for ages 12–15 years.

154 All analyses were computed using R statistical software (version 3.4.0), and a  
155 two-sided significance level was fixed at 0.05.

156

## 157 **Results**

### 158 **Studied patients**

159 Table 1 shows the patients' characteristics. We identified 10,481 in-patient  
160 cases in 67 hospitals and 258,911 out-patient cases from 180 hospitals, who  
161 were diagnosed with asthma. The median age was 2 years (IQR 1, 5 years),  
162 and the most common age category was 0–2 years in inpatients. The median

163 age was 5 years (IQR 3, 9 years), and the most common age category was  
164 6–11 years in outpatients. The number of males was much bigger than females  
165 in both inpatients and outpatients. The median value of the length of stay for  
166 each month was 5 days (IQR 4, 6) during the study period. The proportion of  
167 patients with asthma who visited emergency departments from July 2019 to  
168 June 2020 decreased by more than 30% compared to that from July 2018 to  
169 June 2019.

170

#### 171 **Asthma patients during the COVID-19 pandemic**

172 Figure 1 shows the number of inpatients between July 2019 and June 2020.  
173 There was a seasonal increase from March to June 2019. However, the number  
174 of inpatients from March to June 2020 decreased (Figure 1 a)). Figure 1 b)  
175 shows the results of the interrupted time-series analysis. The results showed a  
176 marked reduction in the number of inpatients from March 2020 to June 2020;  
177 the reduced number of patients during this period was estimated to be 232  
178 ( $P=0.0012$ ). Among the analyses for each age category, the number of  
179 inpatients aged  $\leq 3$  years between July 2019 and June 2020 showed a  
180 statistically significant decrease compared to that between July 2018 and June

181 2019. The number of inpatients of the other age categories also showed  
182 decreasing trends between July 2019 and June 2020 compared to that between  
183 July 2018 and June 2019 (Figure 2 a)–c)).

184 The number of patients who were complicated with an infection showed a  
185 statistically significant decrease between July 2019 and June 2020 compared  
186 to that between July 2018 and June 2019, especially for patients aged  $\leq 3$  years  
187 (Figure 2 d)–f)). There was a statistically significant decrease in the number of  
188 outpatient cases between July 2018 to June 2019 and July 2019 to June 2020  
189 (Figure 1c), d)).

190

### 191 **Trends for the prescription of inhalers**

192 The prescription number of both inhalers and nebulizers for inpatients  
193 decreased during the COVID-19 pandemic. Also, the proportion of nebulizers  
194 decreased by more than that of metered-dose inhalers. (Figure 3)

195

### 196 **Discussion**

197 This study demonstrated the trends of asthma in the pediatric population by  
198 using a large-scale administrative database. Our study had three major  
199 findings.

200 First, pediatric patients with moderate to severe asthma who needed  
201 hospitalization dramatically decreased during the COVID-19 pandemic.

202 Moreover, infant patients controlled their asthma attacks more than school-age  
203 children. There were several reasons for this situation. One reason for asthma

204 is an infection<sup>7</sup>; school closure and 'voluntary lockdown' may have influenced

205 the children's disease. The most common route of infection is contact among

206 children and is well known. Besides, the Japanese government convinced

207 businessmen to stay and work at home during the 'voluntary lockdown' starting

208 in April <sup>8</sup>. Previous reports have shown that adherence improved during

209 lockdown for the COVID-19 pandemic<sup>9</sup>. Besides, PM2.5 was one of the

210 environmental risk factors that decreased in several areas, including India,

211 China, England, and The United States during lockdown. Lockdown caused a

212 reduction in traffic volume, including cars, airplanes, and trains, which resulted

213 in decreased environmental risk factors, including PM2.5, CO<sub>2</sub>, and O<sub>3</sub><sup>101112</sup>.

214 Second, the number of outpatients during the pandemic decreased compared  
215 to that before the pandemic. Most outpatients controlled their asthma, so it is  
216 possible that the patient's parents avoided a hospital visit. These hospital  
217 avoidances in Japan were similar to other countries<sup>13</sup>. Previous reports have  
218 stated that online or telephone health care services increased in European  
219 countries<sup>14</sup>. Online or telephone health care services could have been provided  
220 in Japan; however, there were few cases using online or telephone health care  
221 services in our study (data not shown).

222 Third, doctors prescribed nebulizers more than metered-dose inhalers. The  
223 Japanese Society of Pediatric Allergy and Clinical immunology recommended  
224 using a metered-dose inhaler rather than a nebulizer in March 2020, because a  
225 nebulizer can spread aerosol on caregivers and medical staff. The guideline  
226 has not infiltrated sufficiently to all hospitals and medical staff during a short  
227 period, and infant patients cannot use a metered-dose inhaler.

228 Our study had several limitations. QIP hospitals represented a limited number  
229 of hospitals in Japan. Therefore, it is difficult to generalize our results to  
230 nationwide pediatric asthma patients. However, a previous study<sup>15</sup> for adult's  
231 asthma patients showed similar results to ours. Therefore, we consider that our

232 findings also have validity for inpatients. Although most outpatients with asthma  
233 usually visit clinics, acute hospitals such as QIP hospitals treat patients who  
234 have other comorbidities or follow the acute phase for asthma. Finally, we had  
235 no data about air pollution in Japan.

236

## 237 **Conclusions**

238 We found that the number of pediatric asthma patients did not increase due to  
239 respiratory infections such as COVID-19. These results were supported by  
240 political inventions such as school closure and social distancing. In addition,  
241 infant patients controlled their asthma attacks more than school-age children.  
242 We need to continue the research into trends of pediatric asthma patients after  
243 the COVID-19 pandemic in Japan.

244

## 245 **Acknowledgments**

246 This study was supported by JSPS KAKENHI Grant Number JP19H01075 from  
247 the Japan Society for the Promotion of Science and by the GAP Fund Program  
248 of Kyoto University to Yuichi Imanaka. The funders played no role in the study

249 design, data collection and analysis, decision to publish, or preparation of the  
250 manuscript.

251

## 252 **Declaration of interests**

253 We declare no competing interests.

254

255

256

257

## 258 **Figure legends**

259 Figure 1. Asthma patients during the COVID-19 pandemic. a) Trends of cases of  
260 inpatients between July 2018 to June 2019 and July 2019 to June 2020. b) An  
261 interrupted time-series (ITS) analysis for inpatients. The reduced number of  
262 patients during this period was estimated to be 232 ( $P=0.0012$ ). c) Trends of  
263 cases of outpatients between July 2018 to June 2019 and July 2019 to June  
264 2020. d) ITS analysis for outpatients. The reduced number of patients during this  
265 period was estimated to be 2,975 ( $P=0.0010$ ).

266 Figure 2. Asthma inpatients during the COVID-19 pandemic for each age

267 category. a) An interrupted time-series (ITS) analysis for patients aged <3 years.  
268 The reduced number of patients during this period was estimated to be 155  
269 ( $P<0.001$ ). b) ITS analysis for patients aged 3–5 years. The reduced number of  
270 patients during this period was estimated to be 20 ( $P=0.118$ ). c) ITS analysis for  
271 patients aged  $\geq 6$  years. The reduced number of patients during this period was  
272 estimated to be 36 ( $P=0.164$ ). d) ITS analysis for patients aged <3 years who  
273 were complicated with an infection. The reduced number of patients during this  
274 period was estimated to be 84 ( $P<0.001$ ). e) ITS analysis for patients aged 3–5  
275 years who were complicated with an infection. The reduced number of patients  
276 during this period was estimated to be 39 ( $P=0.086$ ). f) ITS analysis for patients  
277 aged  $\geq 6$  years who were complicated with an infection. The reduced number of  
278 patients during this period was estimated to be 14 ( $P=0.139$ ).

279 Figure 3. Trends for the prescription of inhalers. The proportion of nebulizers  
280 decreased by more than that of metered-dose inhalers.



281 **Table 1 Patients characteristics**

282 **a) In-patient characteristics**

|                                        | Total period | July 1, 2018 to June 30, 2019 | July 1, 2018 to June 30, 2020 |
|----------------------------------------|--------------|-------------------------------|-------------------------------|
| Number of patients                     | 10,481       | 6,245                         | 4,236                         |
| (Special vigilance area)               | (5,929)      | (3,473)                       | (2,456)                       |
| Infectious disease medical institution | 28           | 28                            | 28                            |
| Median age (IQR)                       | 2 (1, 5)     |                               |                               |
| 0–2                                    | 4,307        | 2,698                         | 1,825                         |
| 3–5                                    | 2,563        | 1,574                         | 1,110                         |
| 6–11                                   | 1,582        | 999                           | 667                           |
| 12–15                                  | 241          | 142                           | 111                           |
| Sex                                    |              |                               |                               |
| Male                                   | 5,190        |                               |                               |
| Female                                 | 3,354        |                               |                               |
| Average length of stay (IQR)           | 5 (4, 6)     |                               |                               |
| Urgency admission (ambulance)          | 10,287 (937) | 6,144 (523)                   | 4,143 (414)                   |
| Intensive care unit admission          | 39           | 18                            | 21                            |

283

284

285

**b) Out-patient characteristics**

|                                        | Total period | July 1, 2018 to June 30, 2019 | July 1, 2018 to June 30, 2020 |
|----------------------------------------|--------------|-------------------------------|-------------------------------|
| Number of visited patients             | 258,911      | 147,321                       | 111,590                       |
| Hospitals in special vigilance area    | 98           | 94                            | 91                            |
| Infectious disease medical institution | 42           | 42                            | 41                            |
| Median age (IQR)                       | 5 (3, 9)     |                               |                               |
| 0–2                                    | 12,664       | 8,766                         | 5,988                         |
| 3–5                                    | 12,934       | 9,016                         | 7,061                         |
| 6–11                                   | 14,452       | 10,751                        | 8,806                         |
| 12–15                                  | 5,305        | 3,903                         | 3,260                         |
| Sex                                    |              |                               |                               |
| Male                                   | 23,922       |                               |                               |
| Female                                 | 16,476       |                               |                               |

286

287 Reference

- 288 1. Dong E, Du H, Gardner L. An interactive web-based dashboard to track  
289 COVID-19 in real time. *Lancet Infect Dis.* 2020;20(5):533-534.  
290 doi:10.1016/S1473-3099(20)30120-1
- 291 2. Tsutomu Watanabe; Tomoyoshi Yabu. Japan's Voluntary Lockdown.  
292 *Covid Econ.* 2020;46(1):1-31.
- 293 3. Arakawa H, Hamasaki Y, Kohno Y, et al. Japanese guidelines for  
294 childhood asthma 2017. *Allergol Int.* 2017;66(2):190-204.  
295 doi:10.1016/j.alit.2016.11.003
- 296 4. Levin M, Ansotegui IJ, Bernstein J, et al. Acute asthma management  
297 during SARS-CoV2-pandemic 2020. *World Allergy Organ J.*  
298 2020;13(5):100125. doi:10.1016/j.waojou.2020.100125
- 299 5. Ministry of Health L and W. [Reports of a survey, "Discharged Patients  
300 Survey," for assessing the effects of introducing DPC, 2018]. Accessed  
301 March 23, 2020.  
302 [https://www.mhlw.go.jp/stf/shingi2/0000196043\\_00003.html](https://www.mhlw.go.jp/stf/shingi2/0000196043_00003.html).
- 303 6. Ministry of Health L and W. [Dynamic Survey of Medical Institutions and  
304 Hospital Report, 2018] [Internet]. Accessed March 23, 2020.

- 305 <https://www.mhlw.go.jp/toukei/saikin/hw/iryosd/m18/is1802.html>.
- 306 7. Bush A. Pathophysiological Mechanisms of Asthma. *Front Pediatr*.
- 307 2019;7:68. doi:10.3389/fped.2019.00068
- 308 8. Chavasse R, Almario A, Christopher A, Kappos A, Shankar A. The Indirect
- 309 Impact of COVID-19 on Children With Asthma. *Arch Bronconeumol*.
- 310 Published online August 2020. doi:10.1016/j.arbres.2020.07.003
- 311 9. Taquechel K, Diwadkar AR, Sayed S, et al. Pediatric Asthma Health Care
- 312 Utilization, Viral Testing, and Air Pollution Changes During the
- 313 COVID-19 Pandemic. *J allergy Clin Immunol Pract*. Published online
- 314 August 2020. doi:10.1016/j.jaip.2020.07.057
- 315 10. Dhaka SK, Chetna, Kumar V, et al. PM(2.5) diminution and haze events
- 316 over Delhi during the COVID-19 lockdown period: an interplay between
- 317 the baseline pollution and meteorology. *Sci Rep*. 2020;10(1):13442.
- 318 doi:10.1038/s41598-020-70179-8
- 319 11. Chauhan A, Singh RP. Decline in PM(2.5) concentrations over major cities
- 320 around the world associated with COVID-19. *Environ Res*.
- 321 2020;187:109634. doi:10.1016/j.envres.2020.109634
- 322 12. Dutheil F, Baker JS, Navel V. COVID-19 as a factor influencing air

- 323 pollution? *Environ Pollut.* 2020;263(Pt A):114466.
- 324 doi:10.1016/j.envpol.2020.114466
- 325 13. Ciofi Degli Atti ML, Campana A, Muda AO, et al. Facing SARS-CoV-2
- 326 Pandemic at a COVID-19 Regional Children's Hospital in Italy. *Pediatr*
- 327 *Infect Dis J.* 2020;39(9):e221-e225. doi:10.1097/INF.0000000000002811
- 328 14. Wosik J, Fudim M, Cameron B, et al. Telehealth transformation:
- 329 COVID-19 and the rise of virtual care. *J Am Med Inform Assoc.*
- 330 2020;27(6):957-962. doi:10.1093/jamia/ocaa067
- 331 15. Abe K, Miyawaki A, Nakamura M, Ninomiya H, Kobayahi Y. Trends in
- 332 Hospitalizations for Asthma During the COVID-19 Outbreak in Japan. *J*
- 333 *allergy Clin Immunol Pract.* Published online October 2020.
- 334 doi:10.1016/j.jaip.2020.09.060
- 335

# Figure 1

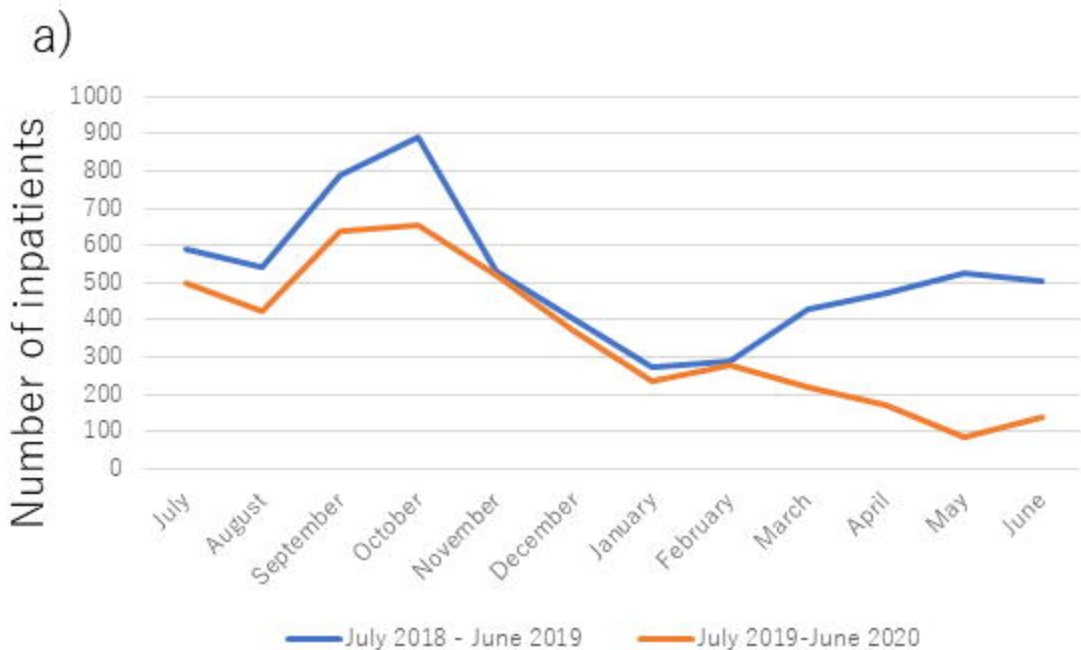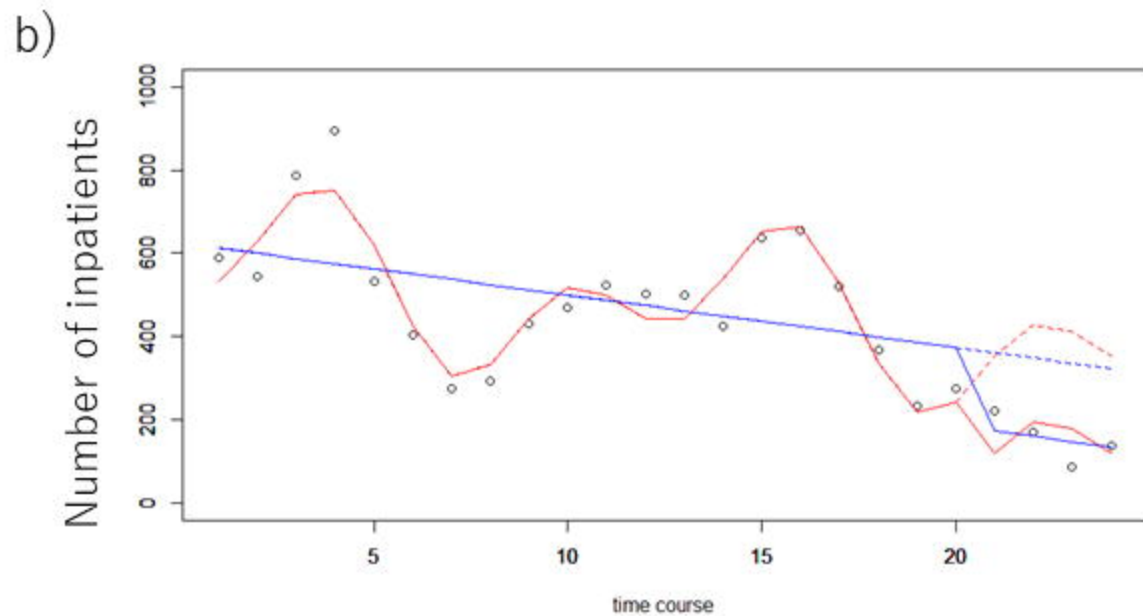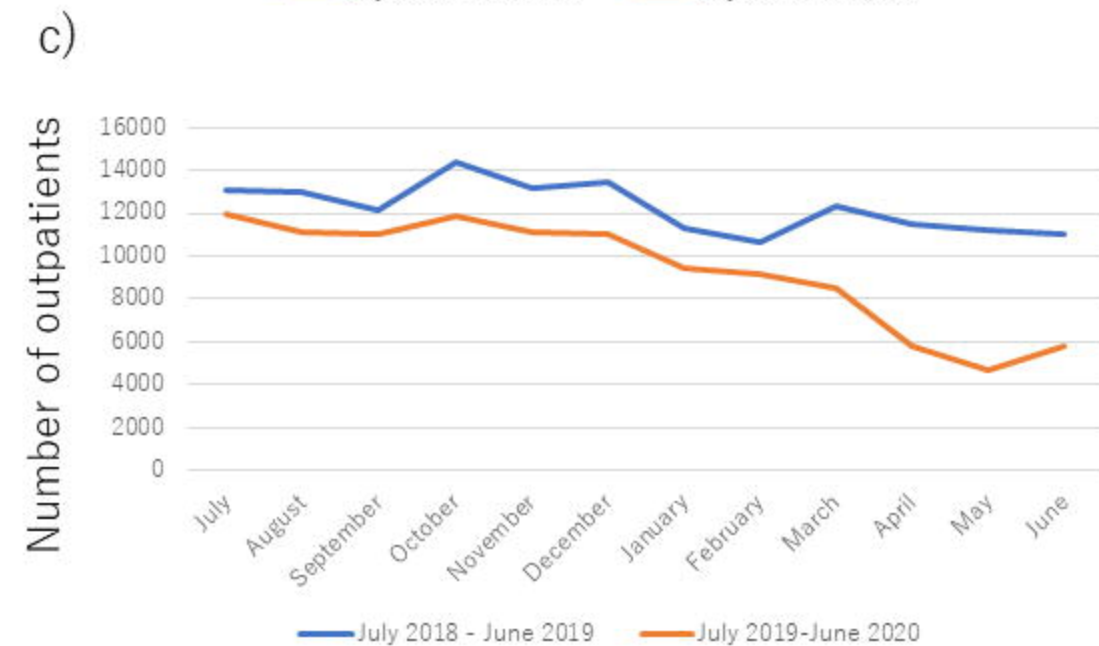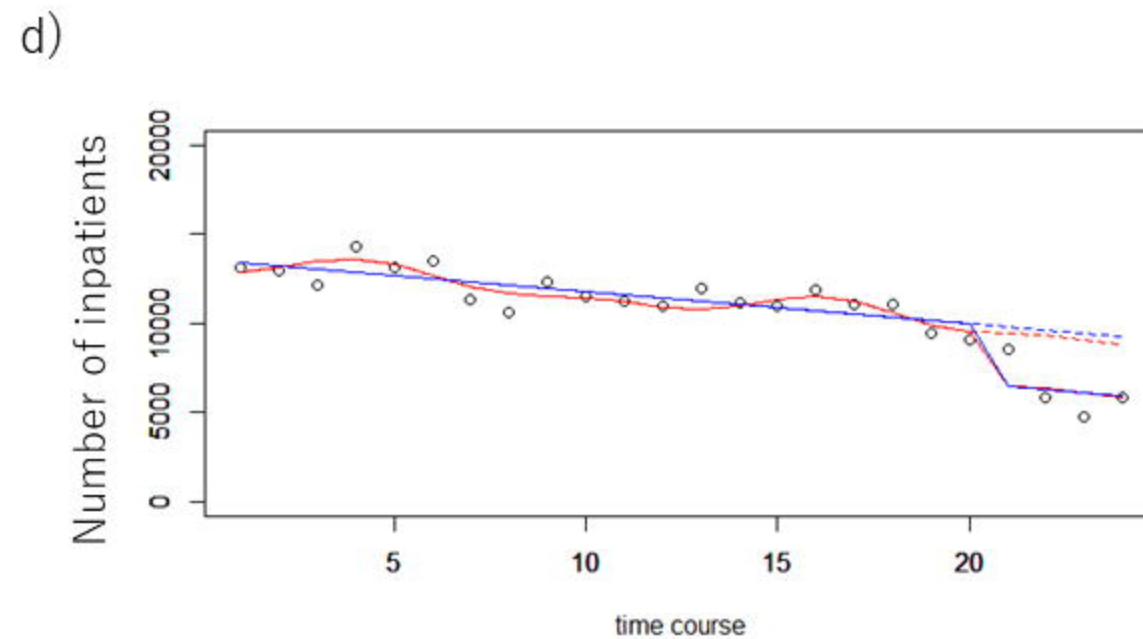

# Figure 2

a)

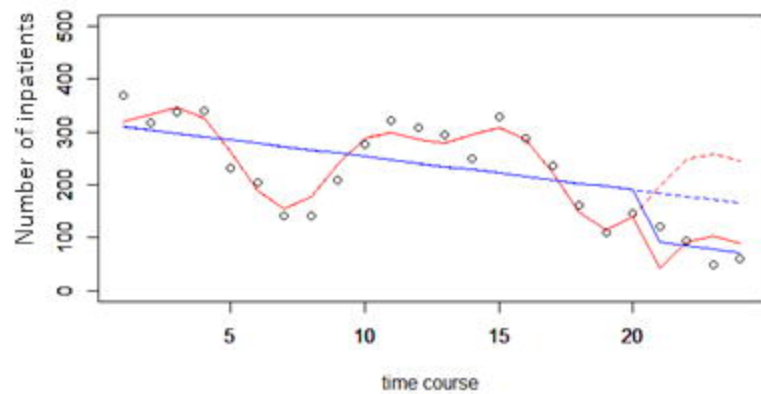

b)

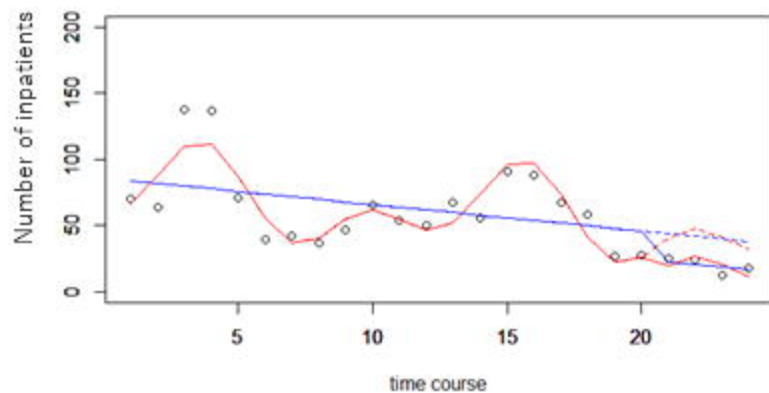

c)

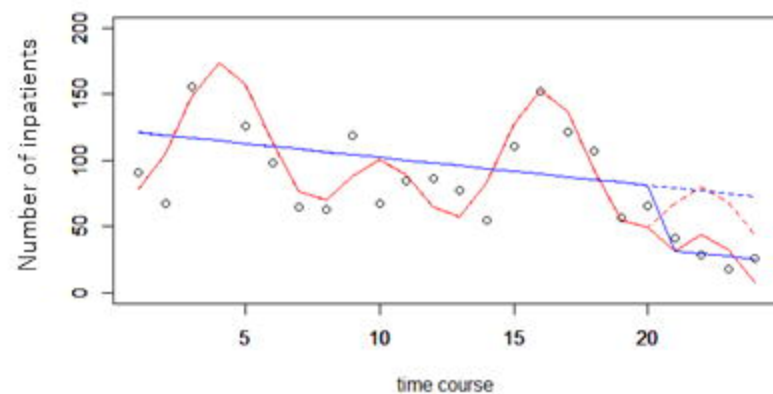

d)

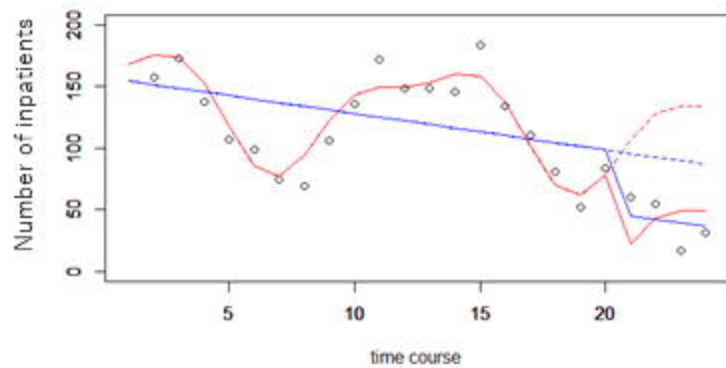

e)

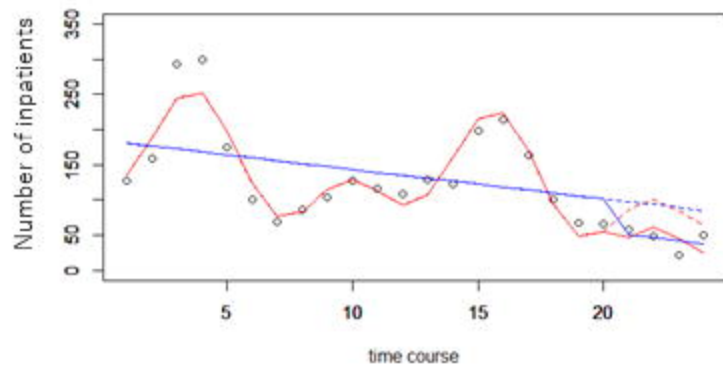

f)

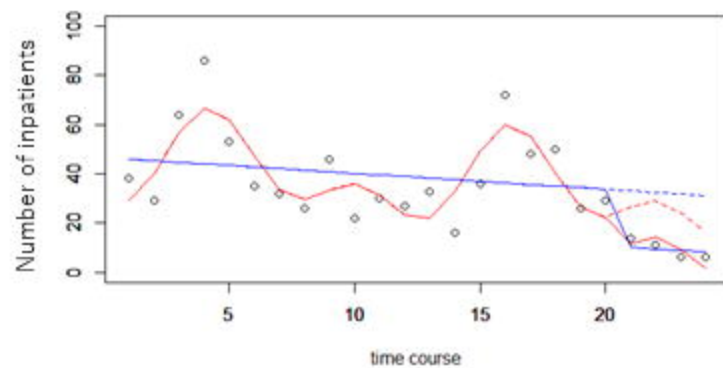

# Figure 3

## The number of prescriptions of MDI

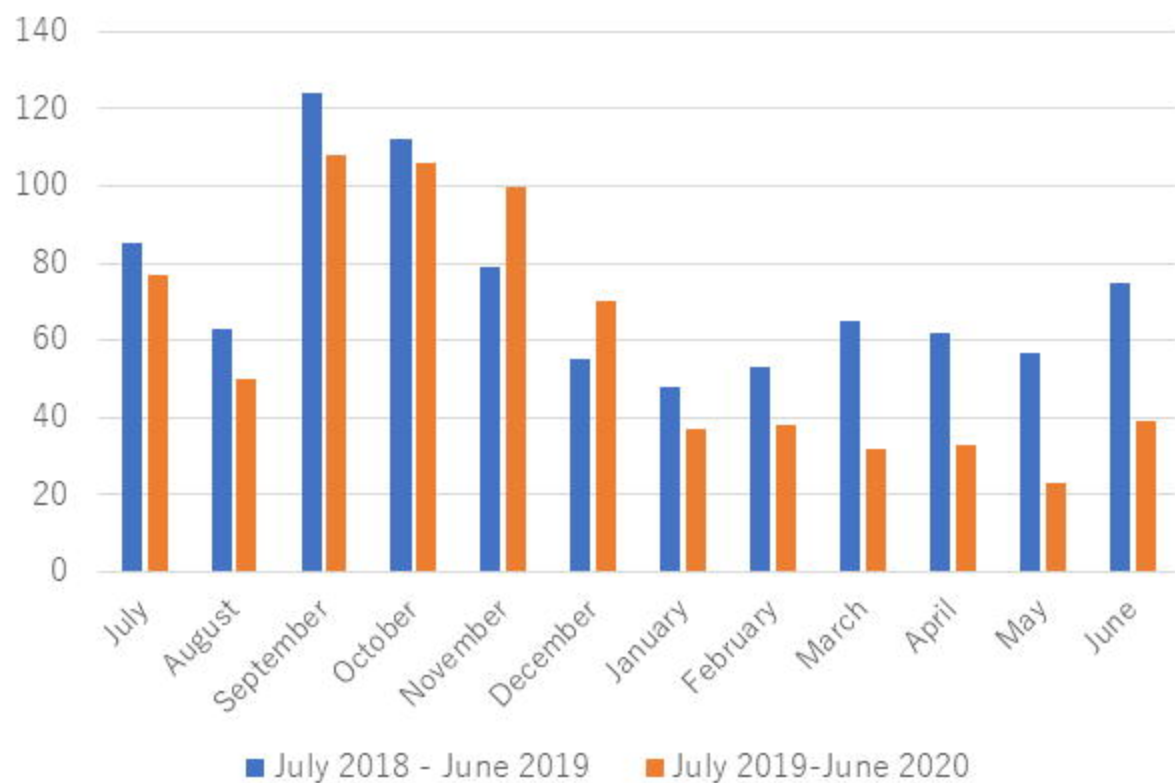

## The number of prescriptions of nebulizers

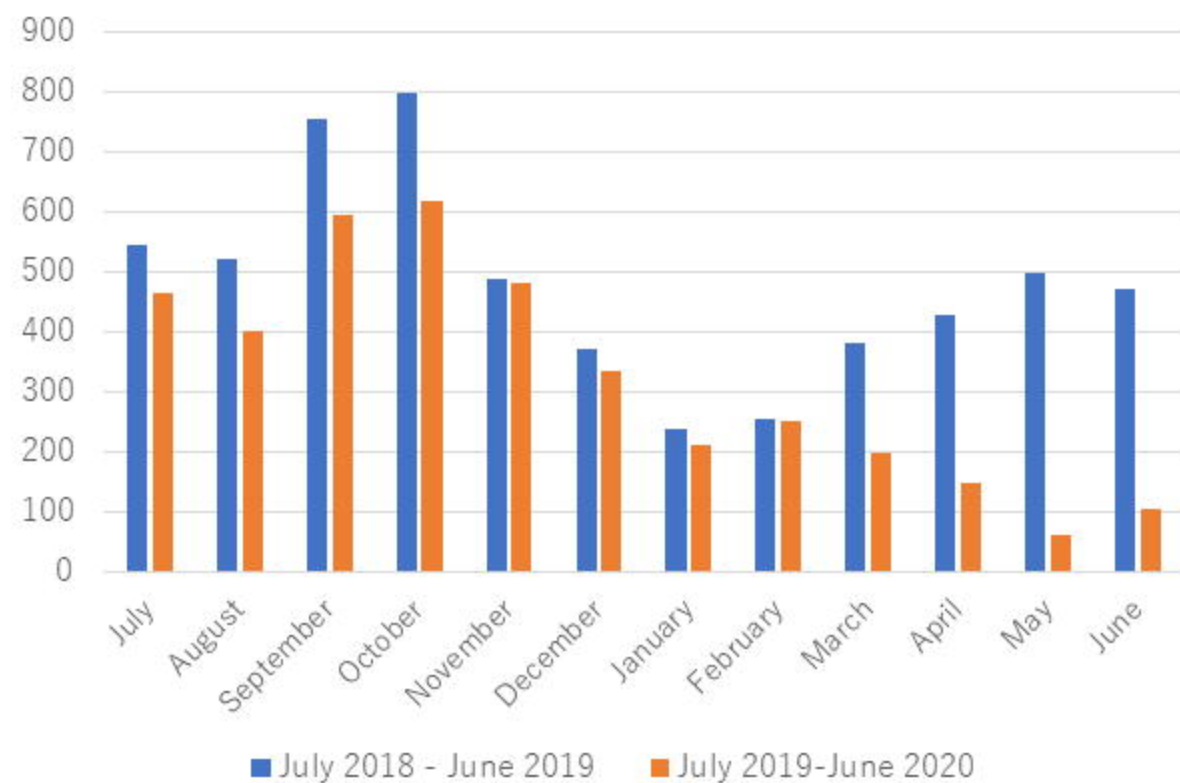

Source: https://medrxiv.org/content/10.1101/2020.11.29.20240374v1.full.pdf
